# Supplementary material
Source: PubMed Central journal article supplement (PMC8285780)
Supplement: 12903_2021_1719_MOESM1_ESM.pdf [file 12903_2021_1719_MOESM1_ESM.pdf]

# Core of the saliva microbiome: an analysis of the MG-RAST data

Simone G Oliveira<sup>1,2</sup>, Rafaela R. Nishiyama<sup>1</sup>, Claudio A.C. Trigo<sup>1</sup>, Ana Luiza de M Guaraldi<sup>3</sup>, Alberto M R Dávila<sup>4</sup>, Rodrigo Jardim<sup>4\*</sup> and Flavio H.B. Aguiar<sup>1</sup>

Material Supplementary

S1 - Microbiome core: Shotgun and Amplicon

## Amplicon sequencing

|                          |                  |                   |
|--------------------------|------------------|-------------------|
| Acinetobacter            | Enterobacter     | Oerskovia         |
| Actinomyces              | Finegoldia       | Okibacterium      |
| Aeromonas                | Flavobacterium   | Prevotella        |
| Alicyclobacillus         | Gemella          | Propionibacterium |
| Amycolatopsis            | Granulicatella   | Pseudomonas       |
| Aquabacterium            | Haemophilus      | Psychrobacter     |
| Arthrobacter             | Kocuria          | Ralstonia         |
| Bacillus                 | Lactobacillus    | Rhizobium         |
| Brachybacterium          | Leifsonia        | Rothia            |
| Candidatus Glomeribacter | Massilia         | Shewanella        |
| Carnobacterium           | Methylobacterium | Sphingobium       |
| Cellulomonas             | Micrococcus      | Sphingomonas      |
| Chryseobacterium         | Mitsuaria        | Staphylococcus    |
| Comamonas                | Mobiluncus       | Streptococcus     |
| Corynebacterium          | Moraxella        | Tannerella        |
| Cupriavidus              | Mycobacterium    | Tetrasphaera      |
| Delftia                  | Neisseria        |                   |
| Dialister                | Nesterenkonia    |                   |
| Empedobacter             | Nocardioides     |                   |

## Shotgun metagenomics

|                   |                    |                           |
|-------------------|--------------------|---------------------------|
| Achromobacter     | Atopobium          | Campylobacter             |
| Acidithiobacillus | Avibacterium       | Candidatus Azobacteroides |
| Acidobacterium    | Bacillus           | Candidatus Koribacter     |
| Acidovorax        | Bacteroides        | Candidatus Pelagibacter   |
| Acinetobacter     | Basfia             | Candidatus Solibacter     |
| Actinomyces       | Bifidobacterium    | Capnocytophaga            |
| Aedes             | Blastopirellula    | Capra                     |
| Aggregatibacter   | Blautia            | Capsaspora                |
| Agrobacterium     | Bordetella         | Caulobacter               |
| Akkermansia       | Bpp-1-like viruses | Cellvibrio                |
| Albidiferax       | Bradybus           | Chelativorans             |
| Algoriphagus      | Bradyrhizobium     | Chitinophaga              |
| Alkalimnicola     | Branchiostoma      | Chlorobaculum             |
| Anabaena          | Brevibacillus      | Chlorobium                |
| Anaeromyxobacter  | Brevibacterium     | Chryseobacterium          |
| Anaerostipes      | Burkholderia       | Chthoniobacter            |
| Aspergillus       | Caenorhabditis     | Ciona                     |

|                   |                     |                  |
|-------------------|---------------------|------------------|
| Citrobacter       | Klebsiella          | Oribacterium     |
| Clostridium       | Kluyvera            | Oryctolagus      |
| Collinsella       | Kluyveromyces       | P2-like viruses  |
| Conexibacter      | Kordia              | Paenibacillus    |
| Corynebacterium   | Ktedonobacter       | Pantoea          |
| Coxiella          | Lactobacillus       | Parabacteroides  |
| Croceibacter      | Lactococcus         | Paracoccus       |
| Cupiennius        | Lambda-like viruses | Pasteurella      |
| Cyanothece        | Laribacter          | Pedobacter       |
| Cytophaga         | Leadbetterella      | Peromyscus       |
| Danio             | Leavenworthia       | Pirellula        |
| Dechloromonas     | Leeuwenhoekiiella   | Piromyces        |
| Dehalococcoides   | Legionella          | Planctomyces     |
| Delftia           | Leifsonia           | Plasmodium       |
| Desulfobacterium  | Lentisphaera        | Polaribacter     |
| Desulfotomaculum  | Leptospira          | Polaromonas      |
| Dialister         | Leuconostoc         | Populus          |
| Dorea             | Listeria            | Prevotella       |
| Drosophila        | Lodderomyces        | Prostheco bacter |
| Dyadobacter       | Lutiella            | Proteus          |
| Eikenella         | Magnetospirillum    | Pseudomonas      |
| Enhydrobacter     | Malassezia          | Pseudovibrio     |
| Enterobacter      | Mannheimia          | Psychrobacter    |
| Enterococcus      | Maribacter          | Ralstonia        |
| Equus             | Marinobacter        | Rhizobium        |
| Erwinia           | Marivirga           | Rhodobacter      |
| Escherichia       | Megasphaera         | Rhodococcus      |
| Ethanoligenens    | Methanosphaera      | Rhodopirellula   |
| Eubacterium       | Methylibium         | Rhodopseudomonas |
| Faecalibacterium  | Methylobacillus     | Rhodospirillum   |
| Flavobacterium    | Methylothera        | Rhodothermus     |
| Fluoribacter      | Methylovorus        | Ricinus          |
| Frankia           | Micrococcus         | Riemerella       |
| Fusobacterium     | Microcoleus         | Roseburia        |
| Gallionella       | Microscilla         | Roseobacter      |
| Gallus            | Moraxella           | Rothia           |
| Geobacter         | Mu-like viruses     | Ruegeria         |
| Glaciecola        | Mucilaginibacter    | Ruminococcus     |
| Gloeobacter       | Mycobacterium       | Saccharophagus   |
| Gluconobacter     | Mycoplasma          | Salinibacter     |
| Gordonibacter     | Myroides            | Salinispora      |
| Gramella          | Myxococcus          | Salmonella       |
| Haemophilus       | Neisseria           | Schistosoma      |
| Hafnia            | Nitratifractor      | Sebaldella       |
| Histophilus       | Nitrobacter         | Selenomonas      |
| Homo              | Nitrosococcus       | Serratia         |
| Idiomarina        | Nitrospira          | Shewanella       |
| Ilyobacter        | Nocardia            | Shigella         |
| Inovirus          | Nodularia           | Sideroxydans     |
| Janthinobacterium | Nostoc              | Sinorhizobium    |
| Jonesia           | Octadecabacter      | Solobacterium    |
| Kingella          | Odocoileus          | Sphingobacterium |

Sphingobium  
Sphingomonas  
Spirosoma  
Stackebrandtia  
Staphylococcus  
Stigmatella  
Streptococcus  
Streptomyces  
Sulfitobacter  
Synechococcus

Synechocystis  
T7-like viruses  
Terrimonas  
Tetraodon  
Thauera  
Thermobaculum  
Tityus  
Treponema  
Trypanosoma  
Veillonella

Verminephrobacter  
Verrucomicrobium  
Wolbachia  
Xanthomonas  
Xenopus  
Xylella  
Yersinia  
Zingiber  
Zunongwangia
