# Supplementary material
Source: PubMed Central journal article supplement (PMC8285780)
Supplement: 12903_2021_1719_MOESM2_ESM.pdf [file 12903_2021_1719_MOESM2_ESM.pdf]

# Core of the saliva microbiome: an analysis of the MG-RAST data

Simone G Oliveira<sup>1,2</sup>, Rafaela R. Nishiyama<sup>1</sup>, Claudio A.C. Trigo<sup>1</sup>, Ana Luiza de M Guaraldi<sup>3</sup>, Alberto M R Dávila<sup>4</sup>, Rodrigo Jardim<sup>4\*</sup> and Flavio H.B. Aguiar<sup>1</sup>

Material Supplementary

S2 - Microbiome core among Shotgun, Amplicon and HOMD

## Amplicon x Shotgun

|                  |               |                |
|------------------|---------------|----------------|
| Acinetobacter    | Haemophilus   | Psychrobacter  |
| Actinomyces      | Lactobacillus | Ralstonia      |
| Bacillus         | Leifsonia     | Rhizobium      |
| Chryseobacterium | Micrococcus   | Rothia         |
| Corynebacterium  | Moraxella     | Shewanella     |
| Delftia          | Mycobacterium | Sphingobium    |
| Dialister        | Neisseria     | Sphingomonas   |
| Enterobacter     | Prevotella    | Staphylococcus |
| Flavobacterium   | Pseudomonas   | Streptococcus  |

## Amplicon x HOMD

|                 |                |                   |
|-----------------|----------------|-------------------|
| Acinetobacter   | Gemella        | Prevotella        |
| Actinomyces     | Granulicatella | Propionibacterium |
| Bacillus        | Haemophilus    | Pseudomonas       |
| Comamonas       | Kocuria        | Ralstonia         |
| Corynebacterium | Lactobacillus  | Rothia            |
| Cupriavidus     | Micrococcus    | Sphingomonas      |
| Delftia         | Mobiluncus     | Staphylococcus    |
| Dialister       | Moraxella      | Streptococcus     |
| Enterobacter    | Mycobacterium  | Tannerella        |
| Finegoldia      | Neisseria      |                   |

## Shotgun x HOMD

|                 |                 |               |
|-----------------|-----------------|---------------|
| Achromobacter   | Burkholderia    | Fusobacterium |
| Acidovorax      | Campylobacter   | Haemophilus   |
| Acinetobacter   | Capnocytophaga  | Kingella      |
| Actinomyces     | Caulobacter     | Klebsiella    |
| Aggregatibacter | Corynebacterium | Kluyvera      |
| Agrobacterium   | Delftia         | Lactobacillus |
| Atopobium       | Dialister       | Lactococcus   |
| Bacillus        | Eikenella       | Listeria      |
| Bacteroides     | Enhydrobacter   | Megasphaera   |
| Bifidobacterium | Enterobacter    | Micrococcus   |
| Bordetella      | Enterococcus    | Moraxella     |
| Bradyrhizobium  | Escherichia     | Mycobacterium |
| Brevibacterium  | Eubacterium     | Mycoplasma    |

Neisseria  
Oribacterium  
Paenibacillus  
Paracoccus  
Pedobacter  
Prevotella  
Proteus

Pseudomonas  
Ralstonia  
Rhodobacter  
Rothia  
Selenomonas  
Serratia  
Solobacterium

Sphingomonas  
Staphylococcus  
Streptococcus  
Treponema  
Veillonella  
Yersinia
